# Supplementary material
Source: PubMed Central journal article supplement (PMC10601718)
Supplement: jb.00274-23-s0002.pdf [file jb.00274-23-s0002.pdf]

## Supplementary methods

**Growth curves.** *S. pyogenes* stationary precultures were diluted in THY or THY-Tween 80 to an  $OD_{600nm} = 0.05$  and transferred to 96-well plates. These were incubated at 37 °C in a Thermo Scientific Multiskan GO (ThermoFischer Scientific) and growth was determined by measuring absorbance at 600 nm every 10 min after shaking the plates.
